# Supplementary material
Source: Springer Nature journal article supplement (https://www.springermedizin.de/resource/supplementary/12885_2006_565_MOESM8_ESM.pdf/9469786)

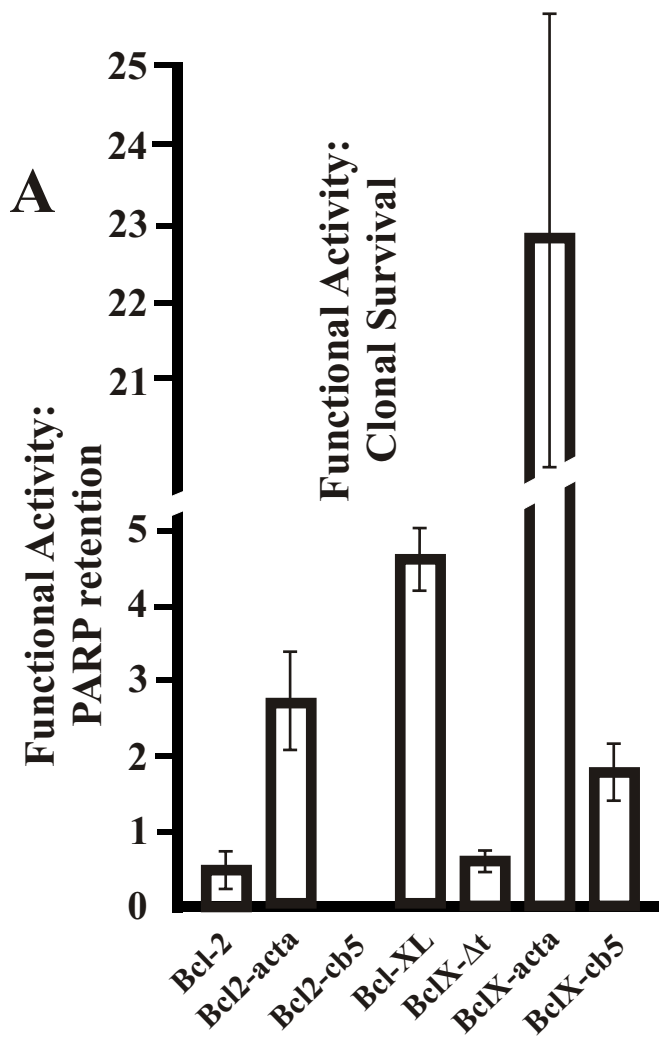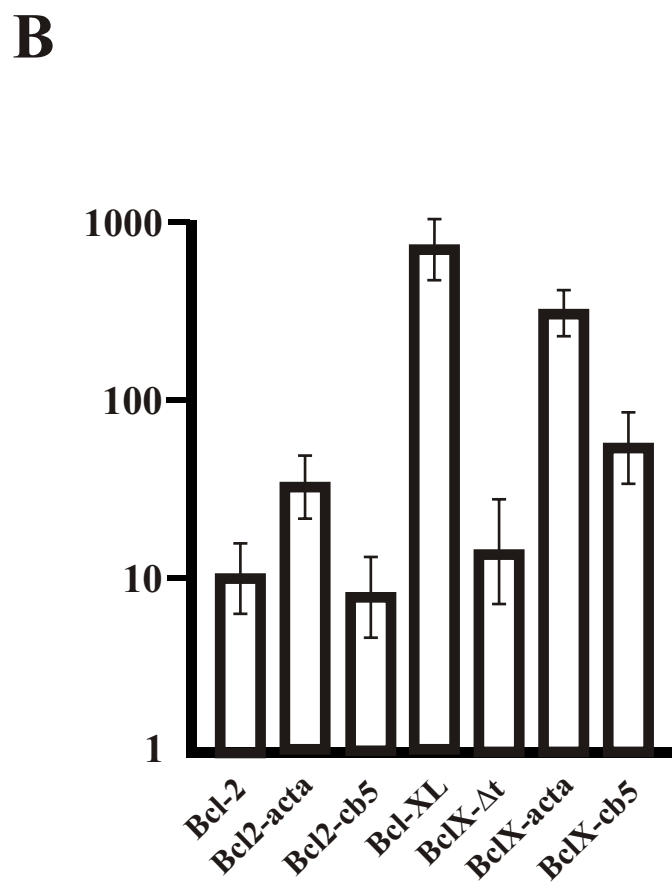

Fiebig et al., Figure 7

Supplement: MOESM8 [file 9469786]
